# Supplementary material
Source: ML conference proceedings conference paper supplement (https://openaccess.thecvf.com/content/ICCV_2019/html/Hermosilla_Total_Denoising_Unsupervised_ICCV_2019_paper.html)
Supplement: Supplementary file 1 [file Hermosilla_Total_Denoising_Unsupervised_ICCV_2019_supplemental.pdf]

Archive with 2 entries (2 files):
- 5698-supp.pdf
- 5698-video.mp4
