# Supplementary material
Source: ML conference proceedings conference paper supplement (https://openaccess.thecvf.com/content/ICCV_2019/html/Hermosilla_Total_Denoising_Unsupervised_ICCV_2019_paper.html)
Supplement: Supplementary file 1 [file Hermosilla_Total_Denoising_Unsupervised_ICCV_2019_supplemental.pdf › 5698-supp.pdf]

# Supplementary Material

## Total Denoising: Unsupervised Learning of 3D Point Cloud Cleaning

Pedro Hermosilla  
Ulm University

Tobias Ritschel  
University College London

Timo Ropinski  
Ulm University

### A. Error distribution

We studied the distribution of points wrt. the distance to the underlying surface in our test dataset. Fig. 1 (left) presents a histogram with the results of such study. Here we can see how the distribution of points has its maximum at distance 0.0 from the real surface and decreases with distance, following the same distribution as in the supervised setting.

### B. Convergence

Fig. 1 (right) illustrates the evaluation error during training for two networks trained on the smallest dataset (.5 Million points). One network is trained with our algorithm (FULL) and the other one with supervised training. We can see that in both cases the loss decreases during training similarly. However, our algorithm converges to a lower error than supervised learning. With more training data, this gap is reduced until the curves cross.

### C. Prior Kernel

We experimented with different kernels for our prior: Gaussian ( $k_g$ ), Wendland ( $k_w$ ), and Inverse Multi-Quadric ( $k_i$ ). All kernels were adjusted to fit in the range  $[-1, 1]$ :

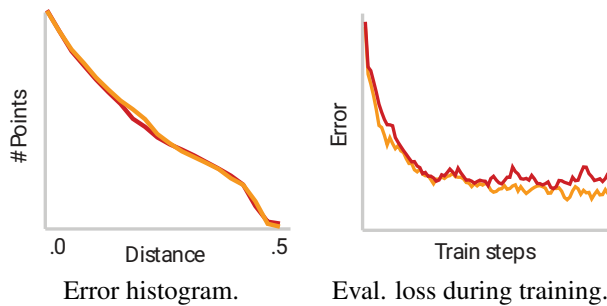

Figure 1. Ours (FULL) ● vs Supervised ●

Table 1. Error obtained for different functions used as our prior.

| Prior               | $\alpha_1$ | $\alpha_2$ | $\alpha_3$ |
|---------------------|------------|------------|------------|
| Gauss. ( $k_g$ ) ●  | .567       | .548       | .556       |
| Wedland ( $k_w$ ) ● | .595       | .560       | .561       |
| Inv. MQ ( $k_i$ ) ● | .577       | .577       | .582       |

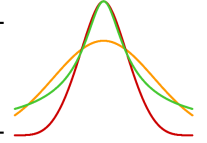

$$k_g(\mathbf{d}) = \frac{1}{\sigma\sqrt{2\pi}} \exp\left(-\frac{\|\mathbf{W}\mathbf{d}\|_2^2}{2\sigma^2}\right),$$

$$k_w(\mathbf{d}) = (1 - \|\mathbf{W}\mathbf{d}\|_2^2)^4 (1 + 4\|\mathbf{W}\mathbf{d}\|_2^2),$$

$$k_i(\mathbf{d}) = \frac{1}{\sqrt{1 + (5\|\mathbf{W}\mathbf{d}\|_2^2)^2}},$$

where  $\mathbf{W} = \text{diag}(w)$  and  $w = 1/\alpha r$ . We performed an ablation study for different values of  $\alpha$  and for each kernel independently. For the Gaussian kernel we used  $\alpha_1 = .3$ ,  $\alpha_2 = .5$ , and  $\alpha_3 = .7$ , and for the Wendland and Inverse Multi-Quadric kernel we used  $\alpha_1 = .8$ ,  $\alpha_2 = 1.$ , and  $\alpha_3 = 1.2$ . Tbl. 1 shows that the best performance was obtained by the Gaussian kernel.

### D. Noise levels

Tbl. 3 on the paper tests one neural network trained for all noise levels at the same time. In this experiment, we have trained our network using only one level of noise and report its test error for all levels. We can see from the table, that performance drops only marginally.

| Train | Test |      |      |
|-------|------|------|------|
|       | 0.5% | 1.0% | 1.5% |
| 0.5%  | .435 | .576 | .738 |
| 1.0%  | .431 | .551 | .708 |
| 1.5%  | .467 | .594 | .741 |
| All   | .411 | .534 | .698 |

### E. Iterative refinement

Since our approximation of the surface during training is not exact, the results improve by applying our network several times iteratively. Fig. 2 presents a visual encoding of the distance of each point to the real surface after applying each denoising step.

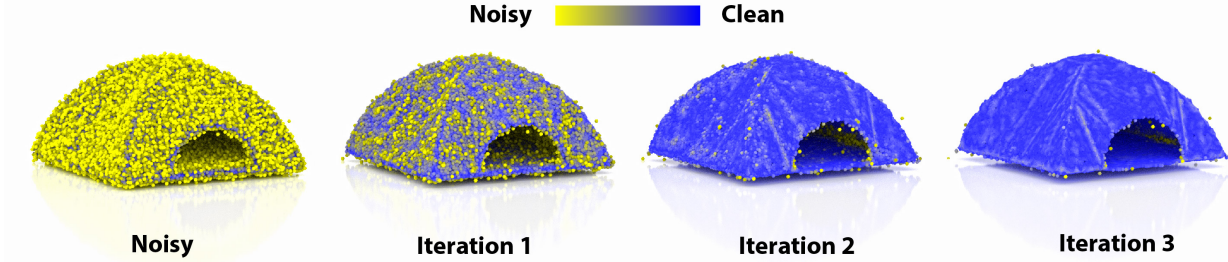

Figure 2. Resulting point cloud of applying our network several times iteratively on a noisy point cloud.

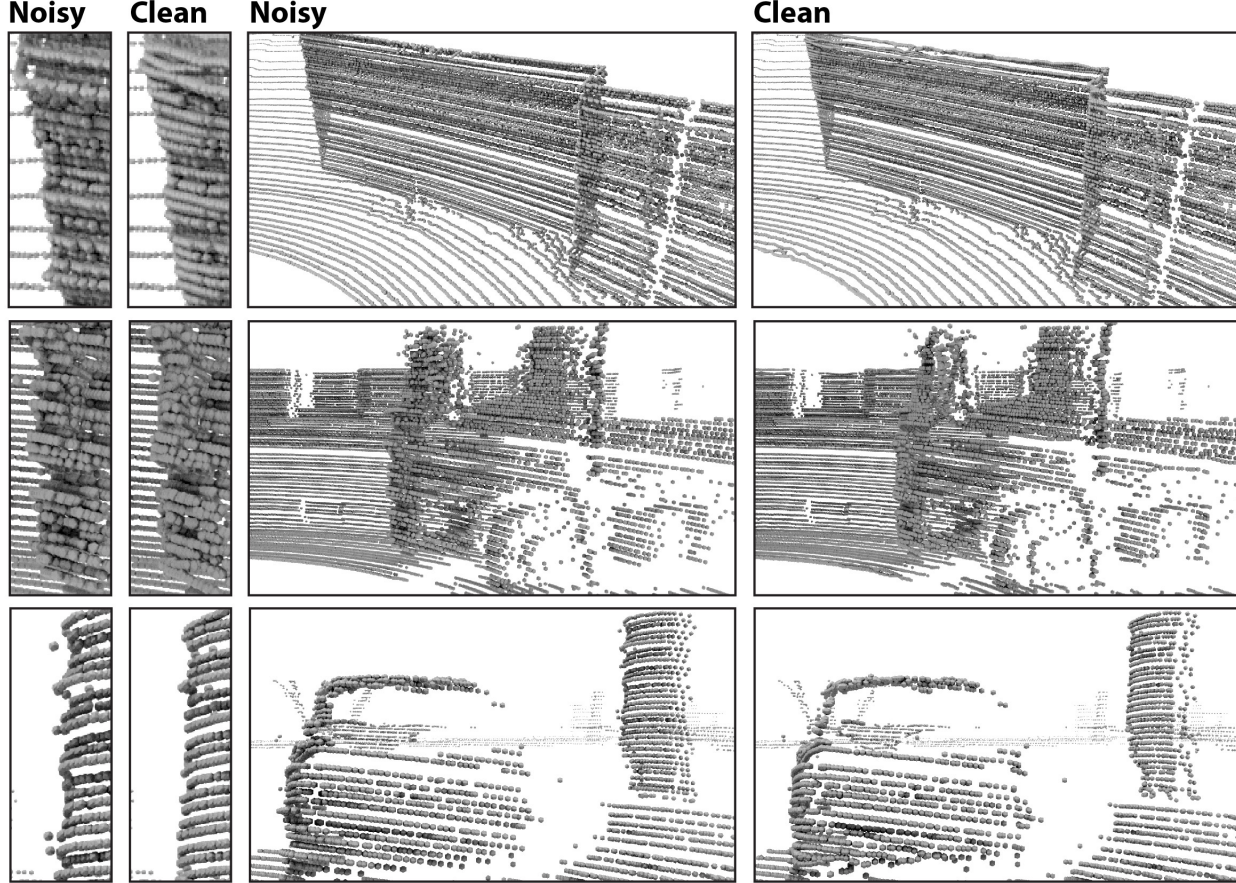

Figure 3. Qualitative results of our network trained on the Kitti dataset [1]. Note how our network is able to remove the noise in sparse point clouds as the one illustrated in the bottom image.

## F. Additional Qualitative Results

We trained our network with the Kitti dataset [1] in order to evaluate the robustness of our method with sparse point clouds. Fig. 3 presents some qualitative results. We can see that our network is able to remove the noise successfully.

Moreover, Fig. 4, and Fig. 5 provide more qualitative results on all the datasets used in the evaluation. In Fig. 4 we can see how our algorithm obtains a quality similar to the network trained with supervised data. Fig. 5 illustrates the result of applying our method to models from the Paris-rue-

Madame Database [2] composed of 375 K-800 K points.

## References

- [1] Andreas Geiger, Philip Lenz, Christoph Stiller, and Raquel Urtasun. Vision meets robotics: The kitti dataset. *International Journal of Robotics Research (IJRR)*, 2013. 2
- [2] Andrés Serna, Beatriz Marcotegui, François Goulette, and Jean-Emmanuel Deschaud. Paris-rue-madame database - a 3D mobile laser scanner dataset for benchmarking urban detection, segmentation and classification methods. In *ICPRAM*, 2014. 2, 4

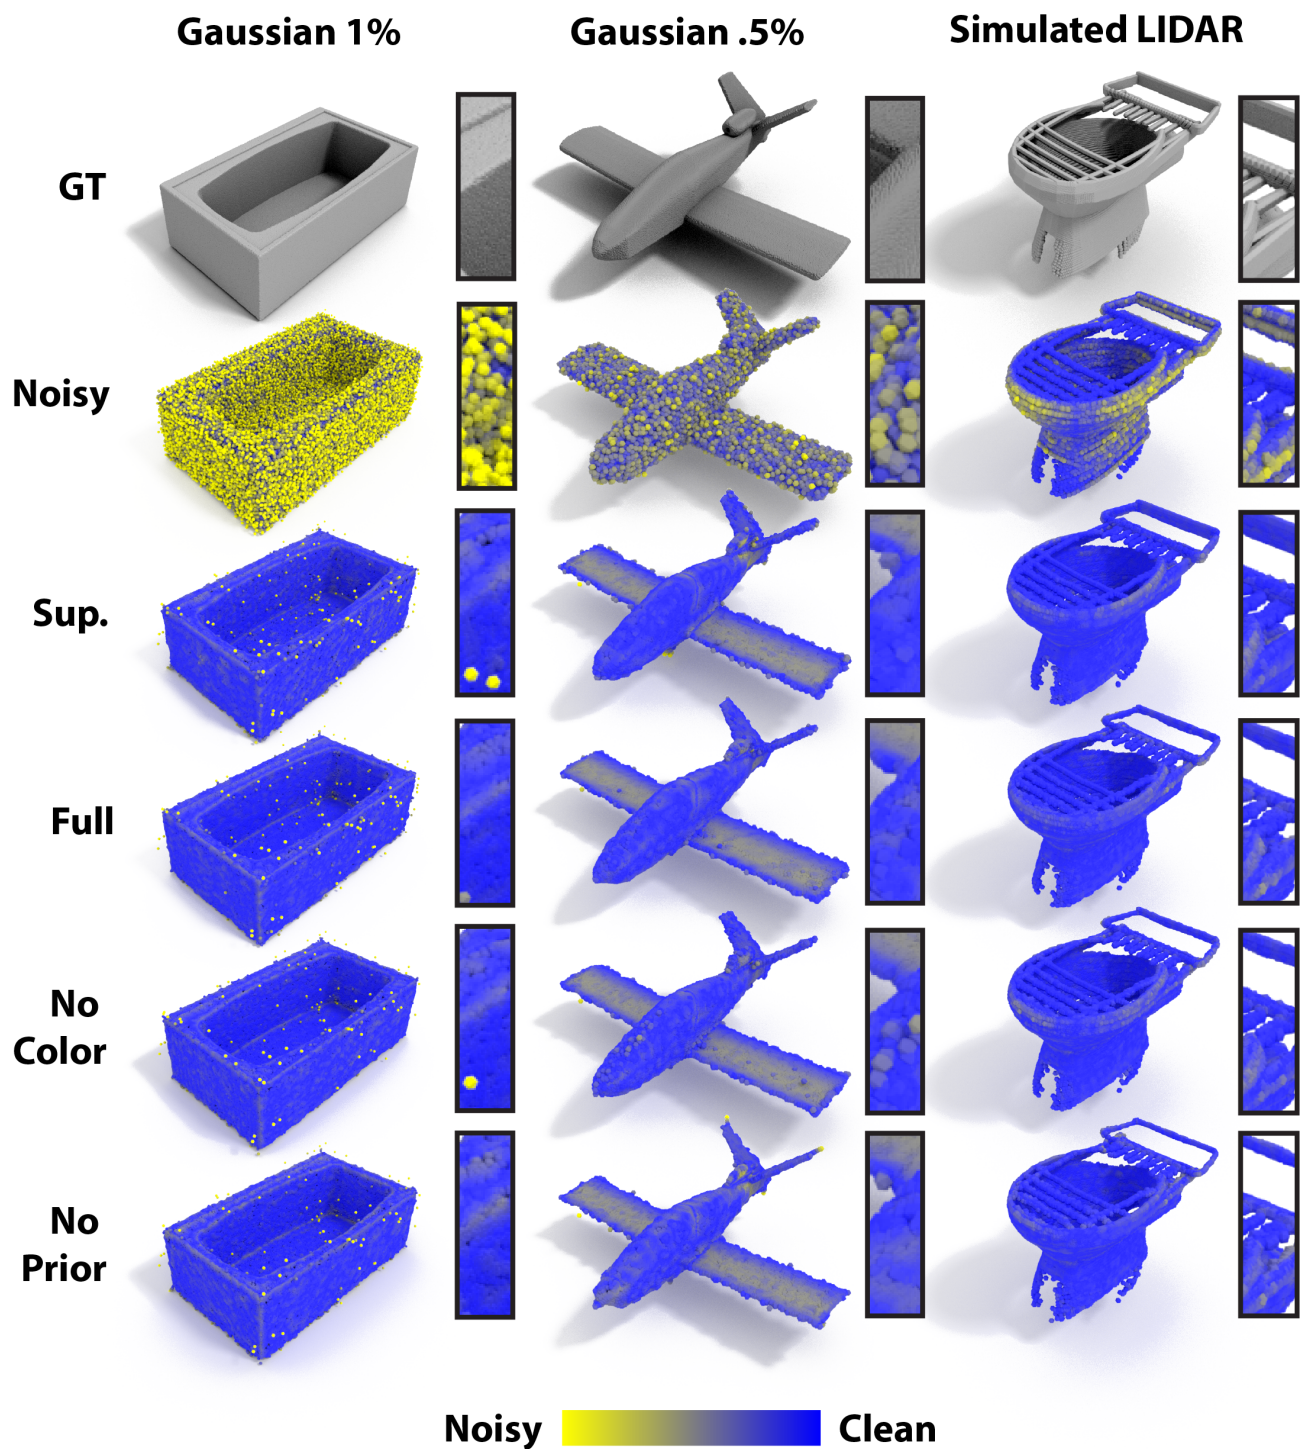

Figure 4. Visual encoding of the distance from each point to the underlying ground truth surface. Here blue indicates zero distance to the surface and yellow 2% of the diagonal of the model. We can see that for the two simulated datasets with different levels of noise, our algorithm achieves (**Full**) almost the same quality as a network trained with supervised data (**Sup.**). Moreover, we evaluated two variants of our training procedure: a prior without color information (**No Color**), and **No Prior**.

Noisy

Clean

Noisy

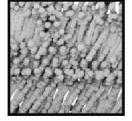

Clean

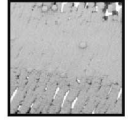

Noisy

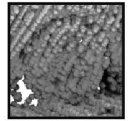

Clean

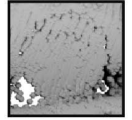

Noisy

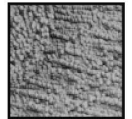

Clean

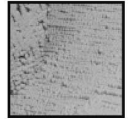

Noisy

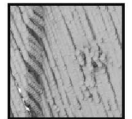

Clean

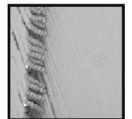

Figure 5. Comparison of our denoising algorithm (**right**) with the noisy scanned data (**left**) from the Paris-rue-Madame Database [2]. The number of points for each model are, from top to bottom, 800 K, 450 K, 450 K, and 375 K points. Our network is able to process each model in parallel in a workstation with a single Nvidia RTX 2080.
